# Supplementary material for: Permittivity boosting in “yellow” (Nb + In) co-doped TiO2
Source: Royal Society of Chemistry journal article supplement (doi:10.1039/d0tc03539d), 2020-01-01
Supplement: d0tc03539d1.pdf [file d0tc03539d1.pdf]

## Supplementary information

### Permittivity boosting in “yellow” (Nb + In) co-doped TiO<sub>2</sub>

Hiroki Taniguchi\*, Daiki Sato, Akitoshi Nakano, and Ichiro Terasaki

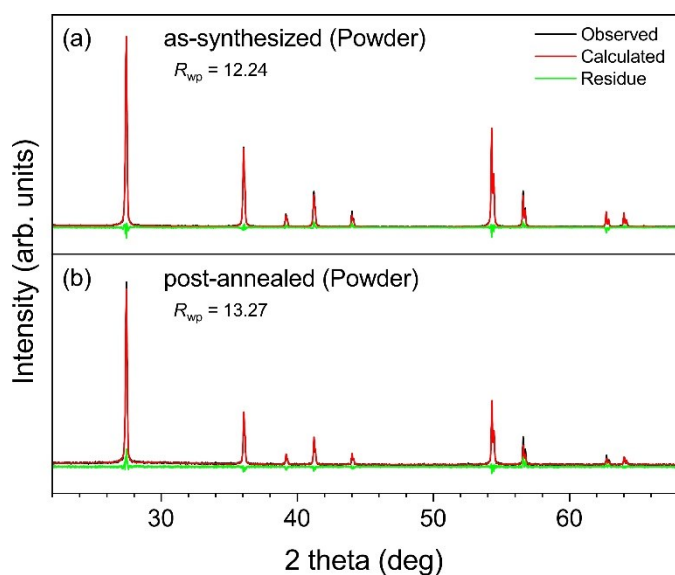

Figure S1. Results of Rietveld analyses for the powder x-ray patterns of (a) the as-synthesized and (b) the post-annealed NITO-1.0%.

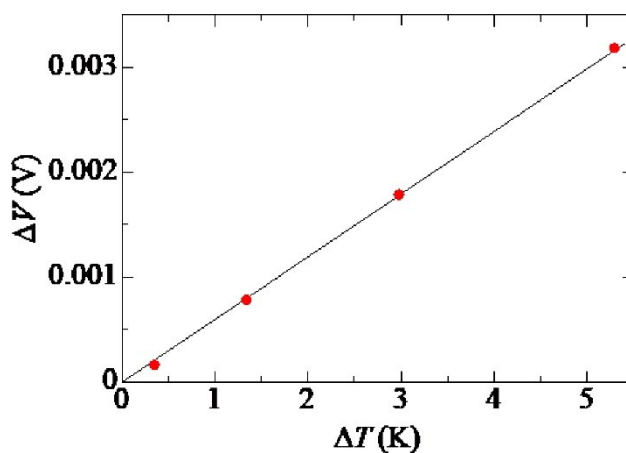

Figure S2. The relationship between the temperature gradient of the sample  $\Delta T$  and thermoelectromotive force  $\Delta V$  on the as-synthesized NITO-1.0% polycrystalline sample, which was measured at 300 K. Since the Seebeck coefficient  $S$  is described as  $S = -\Delta V/\Delta T$ , the estimated value of  $S$  is about  $-600 \mu\text{V}/\text{K}$ , indicating the as-synthesized NITO-1.0% is a *n*-type semiconductor.
